# Supplementary material for: Incorporating biochar to make hydrogel composites with improved structural properties, valorized from waste-paper mill sludge and forestry residues using energy efficient protocols
Source: Royal Society of Chemistry journal article supplement (doi:10.1039/d4su00332b), 2024-01-01
Supplement: d4su00332b1.pdf [file d4su00332b1.pdf]

## ELECTRONIC SUPPLEMENTARY MATERIALS

### Incorporating biochar to make hydrogel composites with improved structural properties, valorized from waste-paper mill sludge and forestry residues using energy efficient protocols

Keerthana Ketheeswaran, Shegufta Shetranjiwalla\*, Manokararajah Krishnapillai, Lakshman Galagedara\*

\*Corresponding author: [lgalagedara@mun.ca](mailto:lgalagedara@mun.ca); [sshetranjiwa@mun.ca](mailto:sshetranjiwa@mun.ca)

† School of Science and the Environment, Memorial University of Newfoundland, Corner Brook, NL, A2H 5G4, Canada

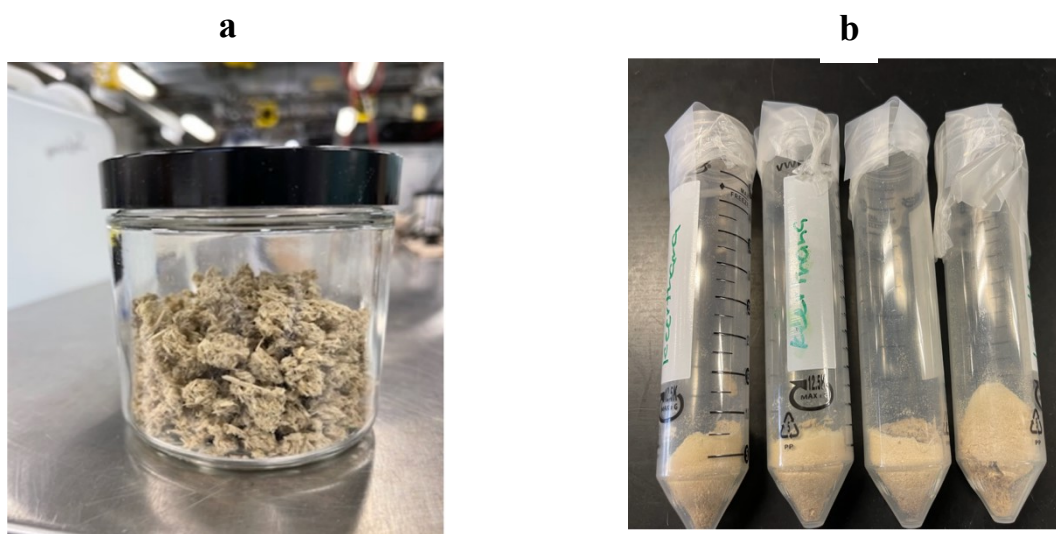

**Fig S1.** (a) Paper mill sludge after preliminary cleaning (b) extracted cellulose

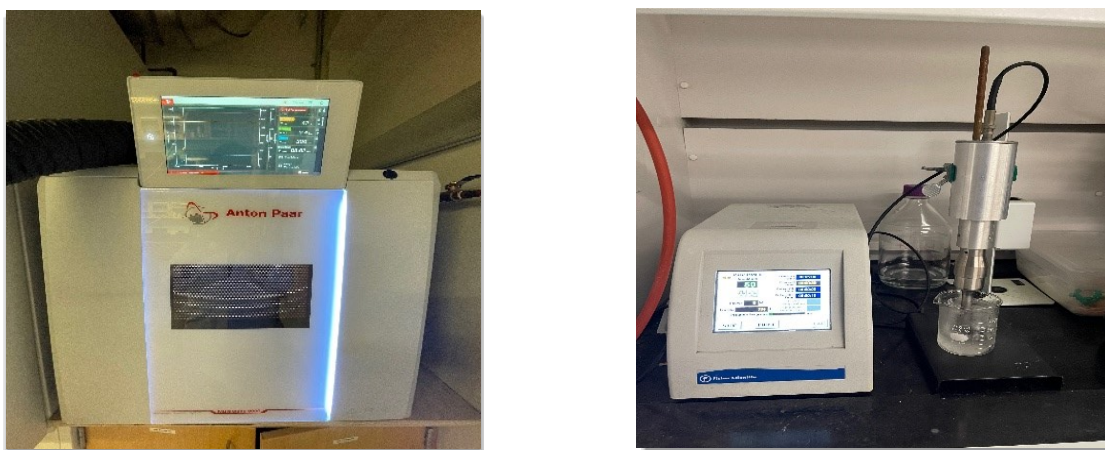

**Fig S2.** Microwave irradiation (left) and ultrasonication extraction (right) of cellulose from paper mill dewatered sludge

|                     | <b>Cellulose (%)</b> | <b>Hemi cellulose (%)</b> | <b>Lignin (%)</b> |
|---------------------|----------------------|---------------------------|-------------------|
| Dewatered sludge    | 66.56                | 19.11                     | 12.3              |
| Extracted cellulose | 93.75                | 4.22                      | 0.67              |

**Table S1**  
Chemical composition of dewatered sludge and extracted cellulose

**Table S2** ANOVA results for gel fraction of different hydrogel composites

| <b>Category</b> | <b>LS means of gel fraction</b> | <b>Homogenous groups</b> |   |   |
|-----------------|---------------------------------|--------------------------|---|---|
| BH1.5           | 86.19                           | A                        |   |   |
| BH1             | 84.18                           |                          | B |   |
| BH0.5           | 82.32                           |                          |   | C |
| CH              | 80.77                           |                          |   | D |

**Table S3** Swelling ratio of different hydrogel composites versus time

| <b>Category</b> | <b>10h</b>                  | <b>20h</b> | <b>30h</b> | <b>40h</b> | <b>50h</b> | <b>60h</b> | <b>70h</b> |
|-----------------|-----------------------------|------------|------------|------------|------------|------------|------------|
| BH1             | 16.01 a                     | 14.10 a    | 12.40 a    | 11.27 a    | 10.30 a    | 9.12 a     | 8.52 a     |
| CH              | 14.88 b                     | 12.63 b    | 11.00 b    | 10.04 ab   | 8.69 b     | 7.80 b     | 7.10 b     |
| BH0.5           | 12.36 c                     | 10.87 c    | 9.72 c     | 8.78 bc    | 7.69 c     | 7.03 c     | 6.35 c     |
| BH1.5           | 10.46 d                     | 9.76 c     | 9.05 c     | 8.49 c     | 7.78 c     | 6.80 c     | 6.16 c     |
| <b>Category</b> | <b>Water absorbency (%)</b> |            |            |            |            |            |            |
| BH              | 968.053 a                   |            |            |            |            |            |            |
| CH              | 883.820 b                   |            |            |            |            |            |            |
| BH0.5           | 804.007 c                   |            |            |            |            |            |            |
| BH1.5           | 755.884 c                   |            |            |            |            |            |            |
| Pr > F(Model)   | <0.0001                     |            |            |            |            |            |            |
| Pr>F(Model)     | <0.0001                     | <0.0001    | <0.0001    | 0.001      | <0.0001    | <0.0001    | <0.0001    |
| Significant     |                             | Yes        | Yes        | Yes        | Yes        | Yes        | Yes        |

**Table S4** Water absorbency of different hydrogel composites

Significant

Yes

**Table S5** Water retention of different hydrogel composites

| <b>Category</b> | <b>10</b> | <b>20</b> | <b>30</b> | <b>40</b> | <b>50</b> | <b>60</b> | <b>70</b> |
|-----------------|-----------|-----------|-----------|-----------|-----------|-----------|-----------|
| BH              | 401.49 a  | 809.58 a  | 902.34 a  | 930.96 a  | 949.00 a  | 957.96 a  | 968.05 a  |
| CH              | 375.15 a  | 745.88 a  | 768.90 a  | 816.03 a  | 792.54 a  | 809.11 a  | 883.82 a  |
| BH0.5           | 396.82 a  | 622.41 a  | 678.35 a  | 686.42 a  | 757.56 a  | 783.63 a  | 804.01 a  |
| BH1.5           | 383.96 a  | 618.61 a  | 605.98 a  | 682.47 a  | 734.62 a  | 732.29 a  | 755.88 a  |
| Pr > F(Model)   | 0.696     | 0.048     | 0.001     | 0.013     | 0.001     | 0.000     | <0.0001   |
| Significant     | No        | Yes       | Yes       | Yes       | Yes       | Yes       | Yes       |

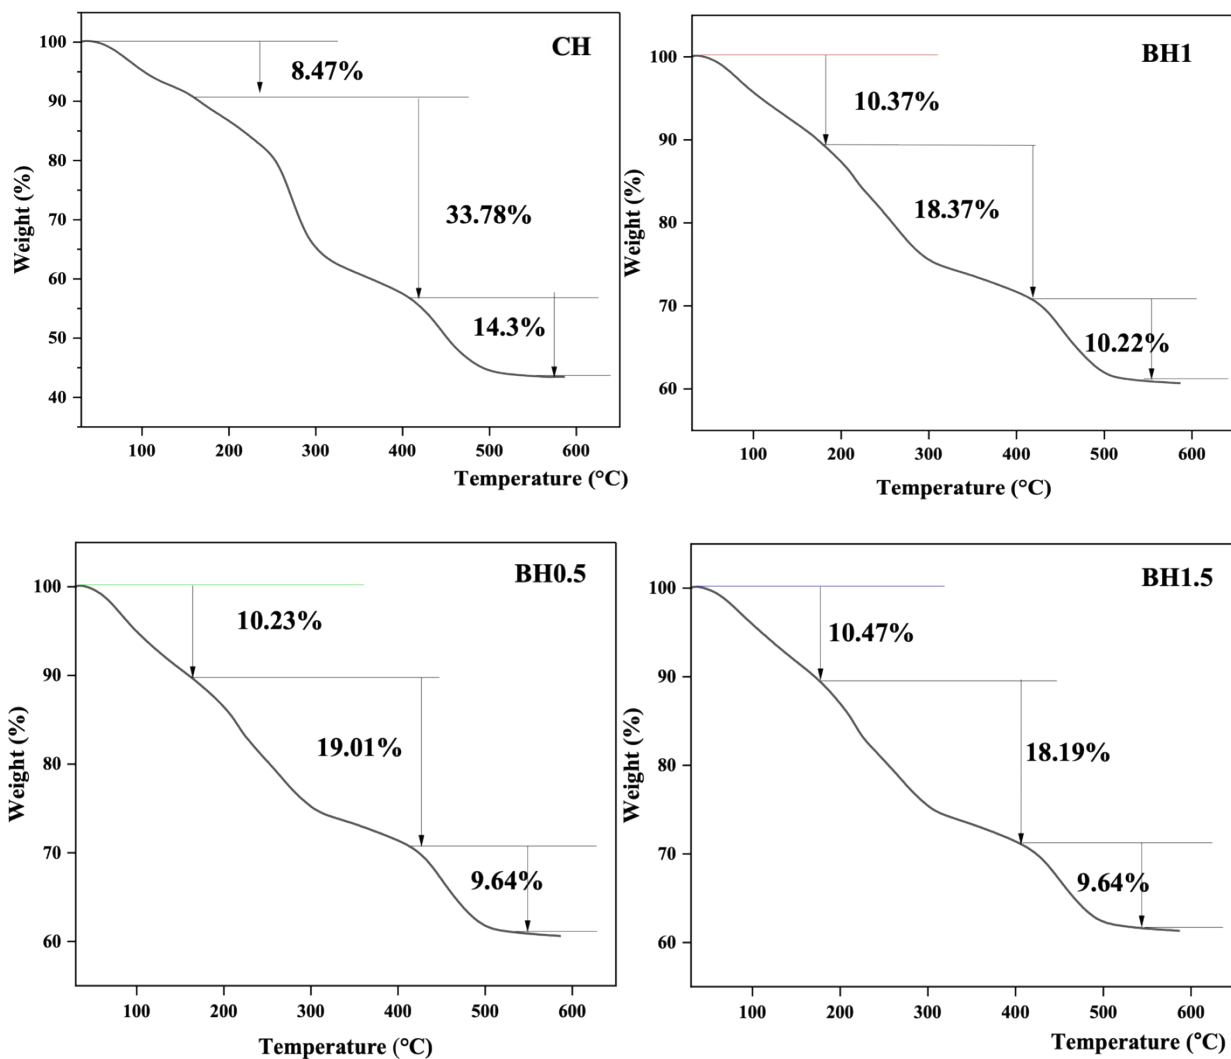

**Fig S3** Weight loss profile thermograms for the cellulose biochar-hydrogel composites at various BC content

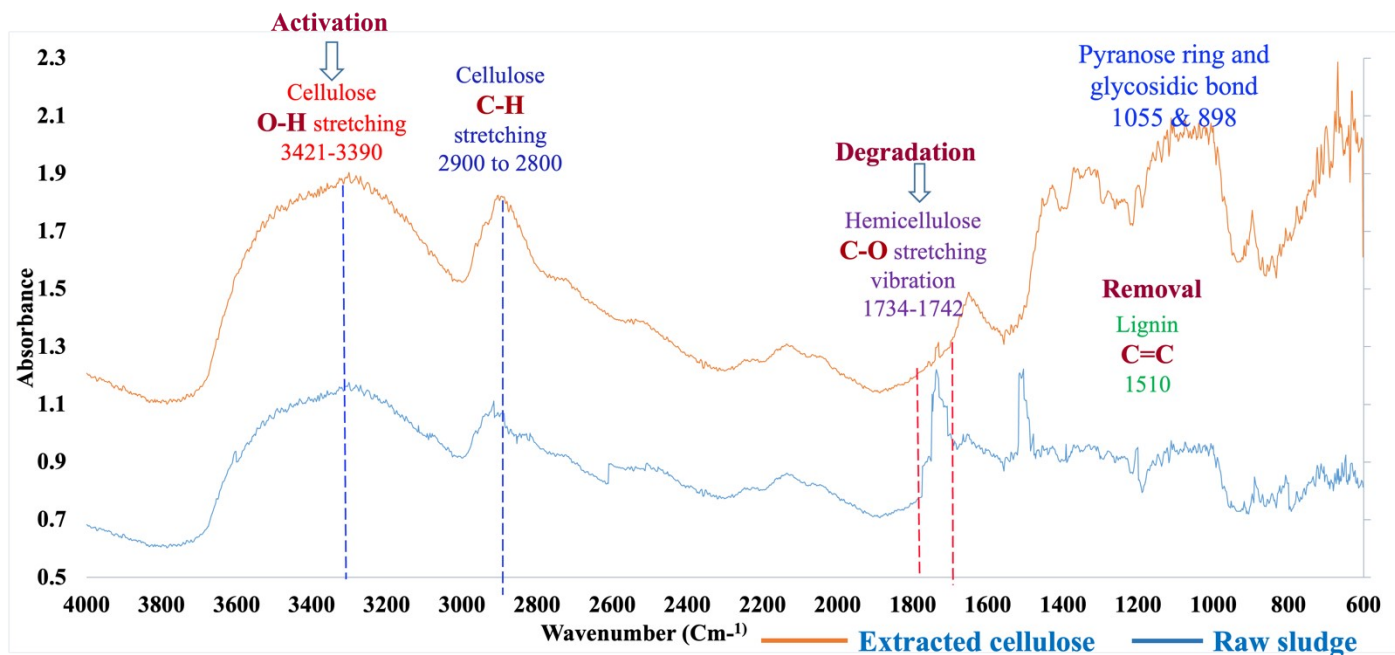

Fig S4. FTIR spectra of dewatered sludge and extracted cellulose.

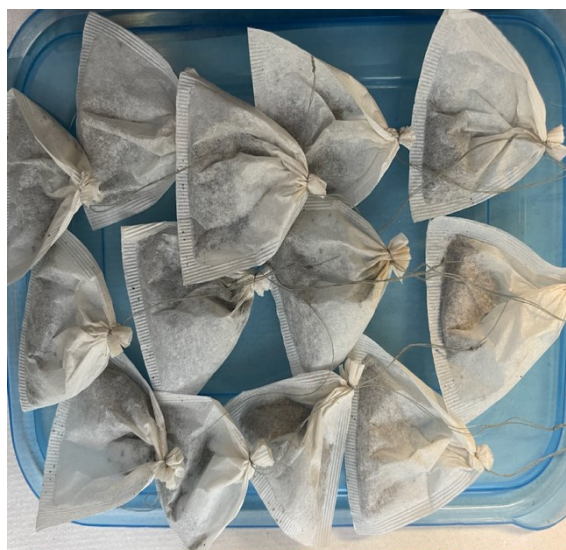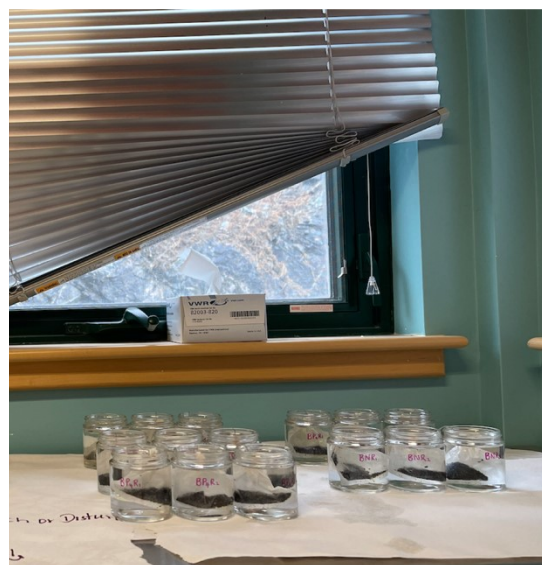

Fig. S5 Performing water retention studies using tea bag method
